# Supplementary material for: Positively charged and flexible SiO2@ZrO2nanofibrous membranes and their application in adsorption and separation
Source: Royal Society of Chemistry journal article supplement (doi:10.1039/c8ra01899e), 2018-01-01
Supplement: c8ra01899e1.pdf [file c8ra01899e1.pdf]

### *S1 Morphologies electrospun PVA/SiO<sub>2</sub> nanofibrous membranes*

Fig. S1 shows the morphologies of electrospun PVA/SiO<sub>2</sub> composite nanofibrous membranes obtained using precursor solutions with different PVA contents. When the PVA content was 5 wt.%, the nanofiber surface was smooth and a small amount of spindle structure was observed. The beads structure disappeared, and the nanofiber distribution was uniform for the PVA content of 6 wt.%. When the PVA content was 7 wt.%, the diameter of the PVA/SiO<sub>2</sub> composite nanofibers was obviously increased and the nanofiber distribution was not uniform. The process of electrospinning involves the spinning solution forming a jet due to the effect of the electrostatic field, and the jet becomes finer and nanofibers were finally solidified on the collecting device. The process of spraying from the jet to the solidified fiber involves the interaction of the viscosity resistance of the spinning solution, the surface tension and the electric field force [1].

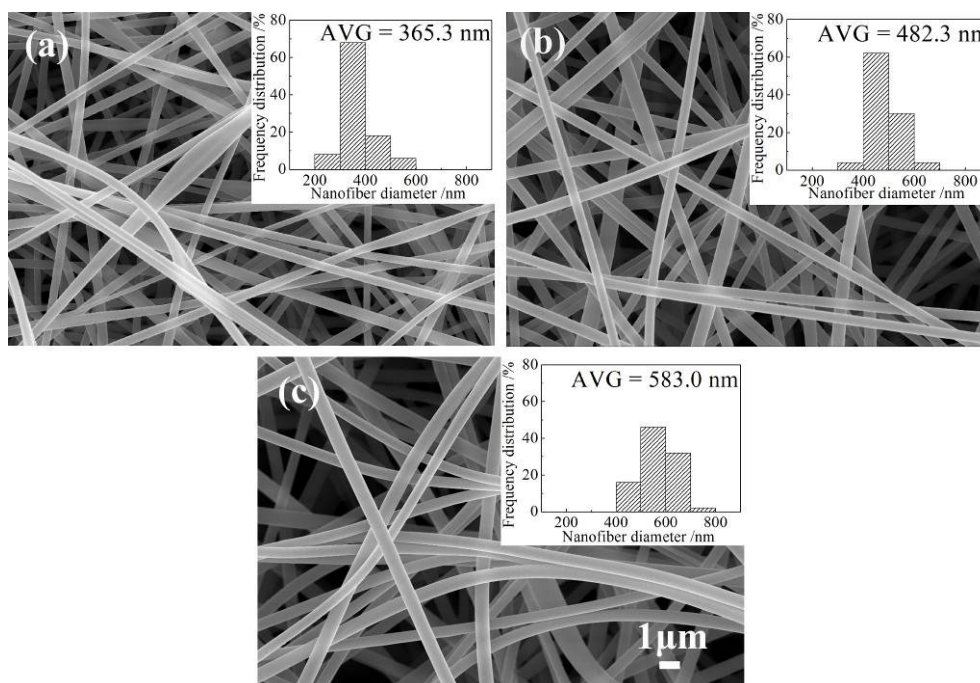

**Fig. S1** Morphologies of electrospun PVA/SiO<sub>2</sub> composite nanofibrous membranes obtained using precursor solutions with different PVA contents: (a) 5 wt.%; (b) 6 wt.%; (c) 7 wt.%. Insets show the diameter distributions of nanofibers in membranes.

Table S1 shows the viscosity, conductivity and surface tension of the precursor solutions with different PVA contents. The viscosity of the spinning solution increased with the increasing PVA content, and the conductivity decreased, while the surface tension was almost invariable. The viscous resistance was generally characterized by viscosity, and the greater the viscosity, the greater the viscosity resistance. In the spinning process, the tensile force of the resistance to the electric field force was strong and the diameter of the nanofiber was large [2]. The lack of viscous resistance to resist the tensile force of the electric field causes the breakage of the jet when the viscosity was too low and gave rise to the formation of a beads structure. The electric field force on the jet was not uniform and because of the blocking effect of viscous resistance when the viscosity is too large, the diameter of the final collected nanofibers will be uneven and will even show entanglement. Insets of Fig. S1 show the diameter distributions of the nanofibers in the membranes. With the increase of the PVA content, the diameter distribution of the PVA/SiO<sub>2</sub> composite nanofiber becomes large. The average diameter increases from 365.3 to 583.0 nm, which is mainly related to the viscosity of the spinning solution [3].

**Table S1** Viscosity, conductivity and surface tension of the precursor solutions with different PVA contents

| PVA content /wt. %                              | 5    | 6    | 7    |
|-------------------------------------------------|------|------|------|
| Viscosity /mPa·s                                | 135  | 243  | 440  |
| Conductivity / $\mu\text{S}\cdot\text{cm}^{-1}$ | 609  | 566  | 437  |
| Surface tension /mN·m <sup>-1</sup>             | 32.6 | 34.5 | 34.3 |

## ***S2 Morphologies SiO<sub>2</sub> nanofibrous membranes***

Fig. S2 shows the morphologies of electrospun SiO<sub>2</sub> nanofibrous membranes obtained using precursor solutions with different PVA contents. The diameter of the SiO<sub>2</sub> nanofibers after calcining was obviously reduced, but its morphology was basically consistent with that before calcining. The diameter shrinkage of the nanofibers was mainly due to the volatilization of the residual solvents and the decomposition of PVA during the calcination process. The inset shows the diameter distributions of the SiO<sub>2</sub> nanofibers in the membranes. The average diameter of the SiO<sub>2</sub> nanofibers increases with the increase of the PVA content, which is the same as that of the uncalcined composite nanofiber. According to the diameter distribution of the nanofibers, the spinning solution with PVA content of 6 wt.% was selected for the follow-up experiment.

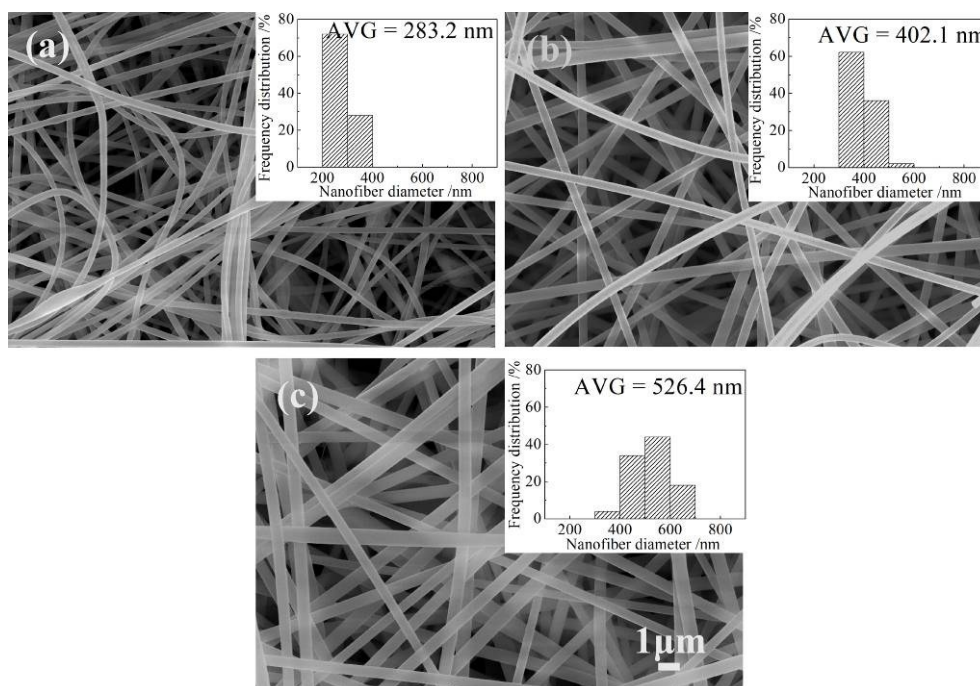

**Fig. S2** Morphologies of electrospun SiO<sub>2</sub> nanofibrous membranes obtained using precursor solutions with different PVA contents: (a) 5 wt.%; (b) 6 wt.%; (c) 7 wt.%. Insets show diameter distributions of nanofibers in membranes.

Fig. S3 shows macro morphology of the SiO<sub>2</sub> nanofibrous membranes. SiO<sub>2</sub> nanofibrous membrane shows excellent flexibility and can be flexed arbitrarily. The flexibility was mainly because the SiO<sub>2</sub> was amorphous and formed by an infinite SiO<sub>4</sub> tetrahedral network, which was consistent with some previous studies [4-5].

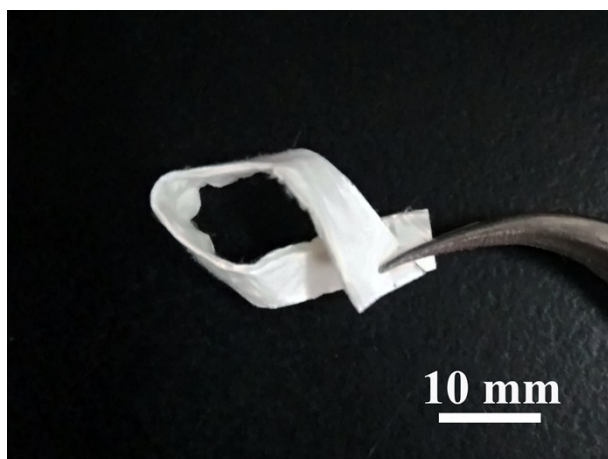

**Fig. S3** Macro morphology of flexible SiO<sub>2</sub> nanofibrous membranes.

### ***S3 Composition SiO<sub>2</sub> nanofibrous membranes***

Fig. S4 shows the FT-IR spectra of the electrospun SiO<sub>2</sub> nanofibrous membranes before and after the calcination. In the absorption spectrum of the composite nanofibers before calcining, 3300 cm<sup>-1</sup> and 2930 cm<sup>-1</sup> were the characteristic peaks of PVA, representing the telescopic vibrations of the hydroxyl group (-OH) and the -CH<sub>2</sub>- on the carbon chain, respectively. The absorption peaks at 1730 cm<sup>-1</sup> and 1430 cm<sup>-1</sup> were caused by the vibrations of C=O and O=C-OR, respectively. The absorption peak at 1090 cm<sup>-1</sup> was due to the flexural vibration of C-O-C. The abovementioned peaks basically conform to the chemical structure of PVA. In addition, the flexural vibration peaks of Si-OH appeared at 950 cm<sup>-1</sup> and 790 cm<sup>-1</sup>, indicating that the composite nanofibers before the calcinations contained incompletely condensed silicic acid. Symmetry stretching vibration peak of Si-O bond was observed at 519 cm<sup>-1</sup>. In the FT-IR spectra of the SiO<sub>2</sub> nanofibrous membranes,

the characteristic peaks of silicic acid and PVA disappear. The Si-O-Si bending vibration peak appeared at 1060  $\text{cm}^{-1}$  and the Si-O bond symmetry stretching vibration peaks appeared at 779  $\text{cm}^{-1}$  and 512  $\text{cm}^{-1}$ , indicating that the membrane component was  $\text{SiO}_2$  after calcination at 600  $^{\circ}\text{C}$  for 2 h.

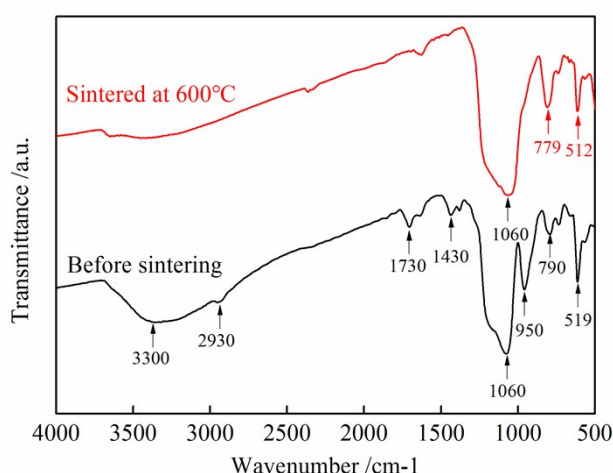

**Fig. S4** FT-IR spectra of electrospun  $\text{SiO}_2$  nanofibrous membranes before and after calcination.

#### ***S4 Morphologies of electrospun $\text{SiO}_2@\text{ZrO}_2$ nanofibrous membranes obtained by different centrifugal speeds***

The purpose of centrifugation was to remove the residual impregnation solution that adheres to the surface and pores of the  $\text{SiO}_2$  fibrous membranes. This can prevent the blockage of the pores that reduced the water flux and the specific surface area of the obtained membranes. Therefore, in addition to the  $\text{ZrOCl}_2$  content of impregnation solutions, the centrifugation speed also affects the morphology and pore sizes of the final nanofibrous membranes. Fig. S5 shows the morphologies of the  $\text{SiO}_2@\text{ZrO}_2$  nanofibrous membranes obtained by different centrifugal speeds in which the  $\text{ZrOCl}_2$  content of the impregnation solution was 3 mol/L. When the centrifugal speed was 6000 r/min, the pore

size distribution of the  $\text{SiO}_2@\text{ZrO}_2$  nanofibrous membrane was uniform and the average pore size was large. With the decrease of the centrifugal speed, the pore size of the  $\text{SiO}_2@\text{ZrO}_2$  nanofibrous membranes was reduced. The impregnated solution attached to the surface and the pore of the  $\text{SiO}_2$  fiber aggregates when the centrifugal speed was 3000 r/min, and the excess  $\text{ZrO}_2$  could partially plug the pores of the  $\text{SiO}_2@\text{ZrO}_2$  nanofibrous membrane after calcining. The brittleness of the  $\text{SiO}_2@\text{ZrO}_2$  nanofibrous membrane increases with the increase of the  $\text{ZrO}_2$  shell thickness. A significant fracture of the nanofibers and the increase in the diameter of the fiber are observed. The pore size distribution of the fiber was uneven, and the average pore size was small because the excess  $\text{ZrO}_2$  occupies the pores of the  $\text{SiO}_2@\text{ZrO}_2$  nanofibrous membrane.

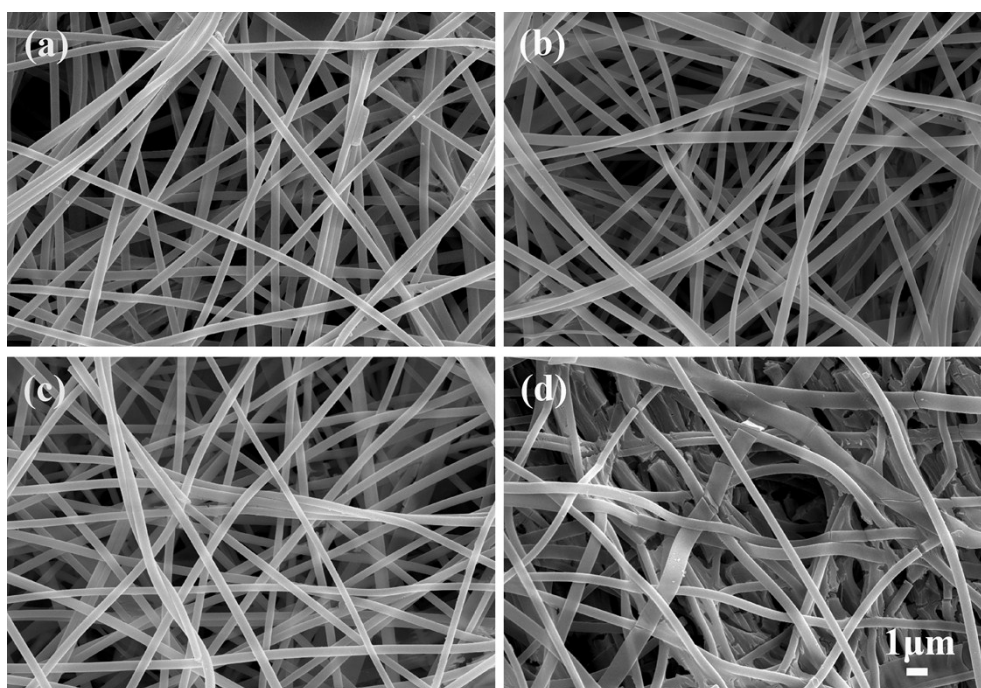

**Fig. S5** Morphologies of  $\text{SiO}_2@\text{ZrO}_2$  nanofibrous membranes obtained by different centrifugal speeds: (a) 6000 r/min; (b) 5000 r/min; (c) 4000 r/min; (d) 3000 r/min.

The pore size distributions of the  $\text{SiO}_2@\text{ZrO}_2$  nanofibrous membranes obtained by different centrifugal speeds were calculated, as shown in Fig. S6. The insets of Fig. S6



show the distributions of the diameters of the  $\text{SiO}_2@\text{ZrO}_2$  nanofibers in the membranes.

With the decrease of the centrifugal speed, the average pore size of the fiber membrane decreased from 768.2 to 498.7 nm, and the small pore size (200-600 nm) in the pore distribution increased. When the centrifugal speed was high, the superfluous impregnated solution on the nanofiber surface can be flung out and the coaxial nanofibers with smooth surfaces and continuity can be obtained. However, when the centrifugal speed was reduced, especially at 3000 r/min, the pore size of  $\text{SiO}_2@\text{ZrO}_2$  nanofibrous membranes was reduced greatly.

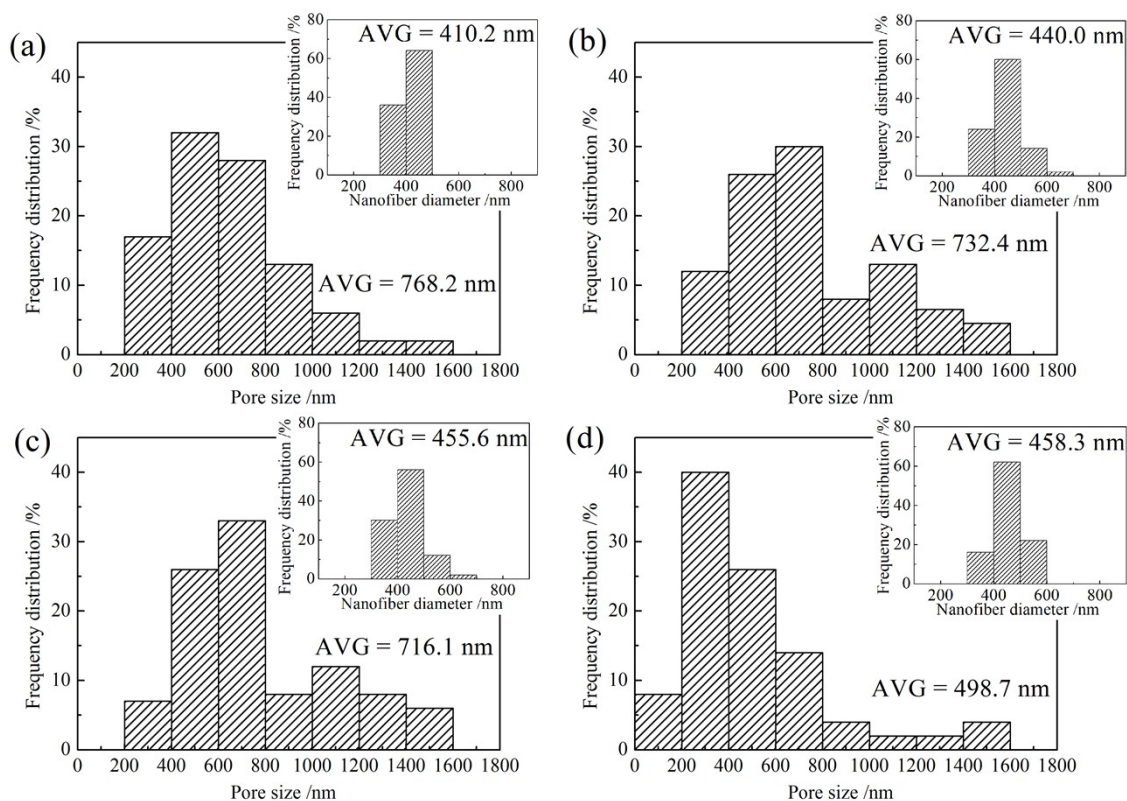

**Fig. S6** Pore size distributions of  $\text{SiO}_2@\text{ZrO}_2$  nanofibrous membranes obtained by different centrifugal speeds: (a) 6000 r/min; (b) 5000 r/min; (c) 4000 r/min; (d) 3000 r/min. Insets show the distributions of the diameters of  $\text{SiO}_2@\text{ZrO}_2$  nanofibers in membranes.

## References

- [1] Y. Tang, S. Fu, K. Zhao, L. Teng, G. Xie, Fabrication of TiO<sub>2</sub> micro-/nano-spheres embedded in nanofibers by coaxial electrospinning, *Mater. Res. Bull.*, 78(2016) 11-15.
- [2] A.F. Spivak, Y.A. Dzenis and D.H. Reneker, A model of steady state jet in the electrospinning process, *Mech. Res. Commun.*, 27(2000)37–42.
- [3] S. Chattopadhyay, J. Saha, G. De, Electrospun anatase TiO<sub>2</sub> nanofibers with ordered mesoporosity, *J. Mater. Chem. A* 21(2014) 9029-9035.
- [4] M. Guo, B. Ding, X. Li, X. Wang, J. Yu, M. Wang, Amphiphobic nanofibrous silica mats with flexible and high-heat-resistant properties[J]. *J. Phy. Chem. C* 114(2010)916-921.
- [5] X. Wang, L. Dou, L. Yang, J. Yu, B. Ding, Hierarchical structured MnO<sub>2</sub>@SiO<sub>2</sub>, nanofibrous membranes with superb flexibility and enhanced catalytic performance, *J. Hazard. Mater.* 324(2017) 203-212.
